# Supplementary material
Source: MDPI journal article supplement (https://www.mdpi.com/2073-4468/8/1/25)
Supplement: s1 [file s1]

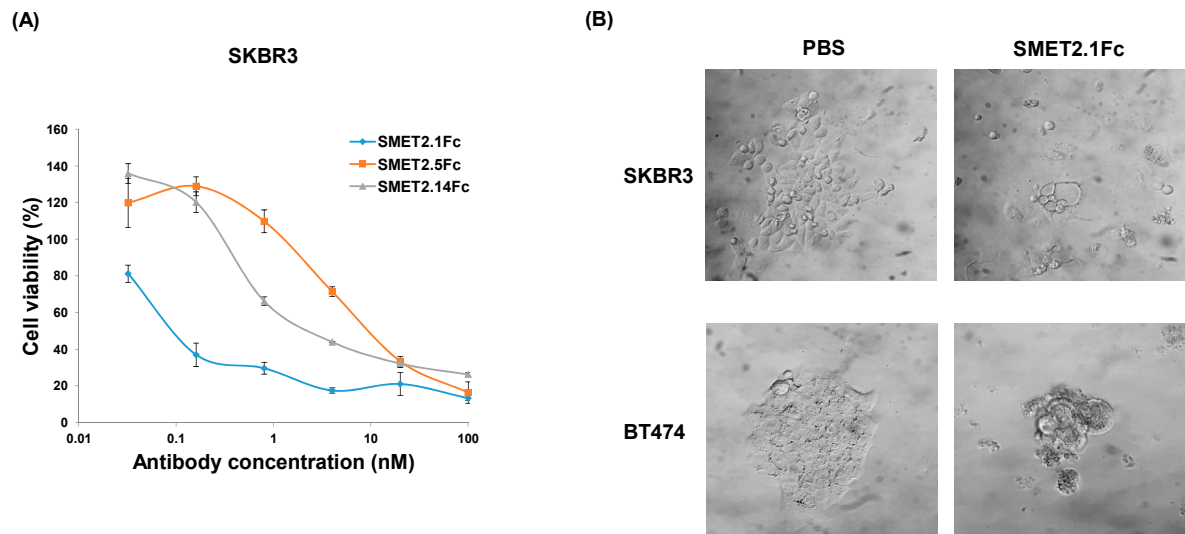

**Figure S1.** Growth inhibition of HER2-overexpressing human breast cancer cell lines by the dAb-Fc fusion proteins in cell cultures. (A) Dose-dependent inhibition of SKBR3 cells by the dAb-Fc fusion proteins. The assay was performed in duplicate. Results are means  $\pm$  standard deviations. (B) Inhibition of SKBR3 and BT474 cells by SMET2.1Fc at a concentration of 4 nM. Representative images were taken after 5 days of incubation.

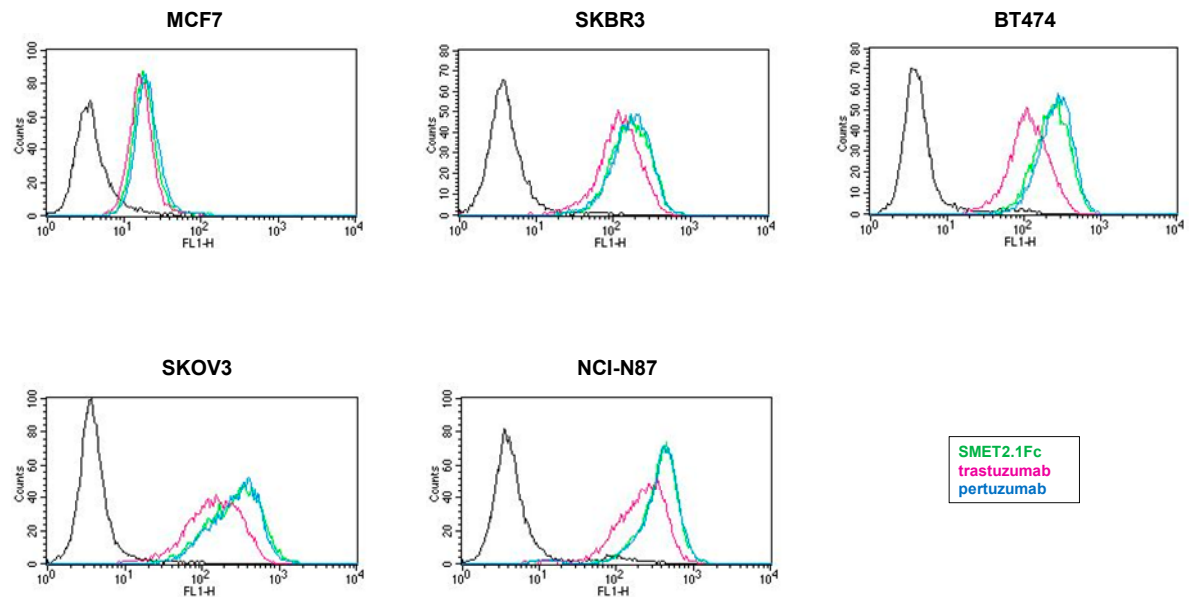

**Figure S2.** Comparative binding of SMET2.1Fc, trastuzumab and pertuzumab to HER2-expressing human cancer cell lines at a concentration of 10 nM as measured by flow cytometry. Trastuzumab and pertuzumab used in this experiment are full-length IgG1 antibodies. Diagrams for reference cells are in black. Diagrams for cells incubated with SMET2.1Fc, trastuzumab and pertuzumab are in green, pink and blue, respectively.

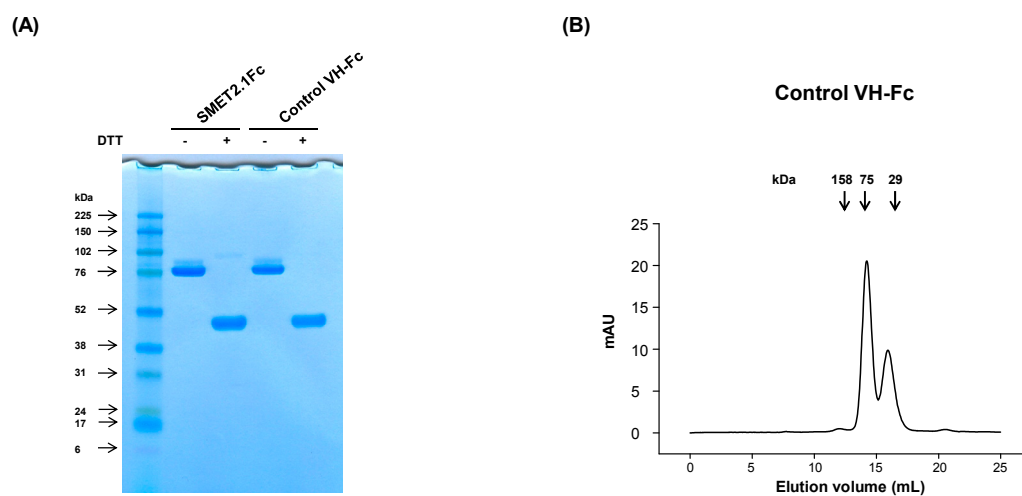

**Figure S3.** Preliminary characterization of a control VH-Fc fusion protein. (A) SDS-PAGE of the control VH-Fc fusion protein. Molecular masses of standards are shown on the left. (B) Size-exclusion chromatography of the control VH-Fc fusion protein. The arrows at the top indicate the elution volumes of molecular mass standards in PBS (pH7.4).

**Table S1.** Amino acid sequences of CDRs of anti-HER2 dAbs.

| Antibody | CDR1 <sup>a</sup> | CDR2     | CDR3               |
|----------|-------------------|----------|--------------------|
| SMET2.1  | GFTFSSYA          | IYTSGST  | ATSPFFDY           |
| SMET2.5  | GFTFSDYY          | IYYSGSI  | ARADSSGYYYDIDY     |
| SMET2.14 | GFTVSSYS          | IYTSGST  | ARGWDLDY           |
| Gr3      | GFTVSYES          | ISSSGGST | VTPERQCKQSTCYARPRY |
| Gr6      | GVRLSAYD          | ISSSGGST | VTLPDLCPGDNCTYPDAS |

<sup>a</sup> CDR sequences are defined according to IMGT numbering scheme.
